# Supplementary material
Source: Research Square preprint supplement (doi:10.21203/rs.3.rs-9818341/v1)
Supplement: Supplementary file 1 [file f6c0beb11a72244acf9f59ed.xlsx]

## Sheet: Sheet1
Additional File 1: Wild edible plant species inventory for Aseko District, Ethiopia (n = 70)
ID	Scientific Name	Family	Local Name (Afaan Oromoo)	Edible Part(s)	Use Category	Source/Habitat	IUCN Status	Preparation Method	Safety Notes	Verification Status	Documentation Notes	Additional Comments
1	Vachellia abyssinica (Hochst. ex Benth.) Kyal. & Boatwr.	Fabaceae	Lafto	Pods, seeds, gum	Famine food	W	LC	Roast/boil pods; extract gum	Generally safe when prepared traditionally	Verified	World Agroforestry database; Ethiopian ethnobotanical surveys	Important dryland food; gum arabic source
2	Senegalia mellifera (Vahl) Seigler & Ebinger	Fabaceae	Qilxuu	Pods, seeds	Famine food	W	LC	Roast seeds	Generally safe when prepared traditionally	Verified	POWO confirms synonymy; famine food documented	Dry areas; taxonomic update from Acacia
3	Vachellia robusta (Burch.) Kyal. & Boatwr.	Fabaceae	Laftoo Bosonaa	Pods, gum	Famine food	W	LC	Extract gum; roast pods	Generally safe when prepared traditionally	Verified	Fabaceae famine foods well-documented	Gum important in dry seasons
4	Vachellia seyal (Del.) P.J.H.Hurter & Mabb.	Fabaceae	Wachu	Gum, young pods	Famine food	W	LC	Extract gum; cook young pods	Generally safe when prepared traditionally	Verified	PROTA confirms edible young pods; major gum source	Dryland gum source
5	Vachellia tortilis (Forssk.) Galasso & Banfi	Fabaceae	Dadacha	Pods, seeds, gum	Food	W	LC	Roast/boil pods	Generally safe when prepared traditionally	Verified	Multiple Ethiopian ethnobotanical studies	Widely used famine food
6	Anogeissus leiocarpa (DC.) Guill. & Perr.	Combretaceae	Birbirsa Gammoojjii	Gum	Famine food	W	LC	Extract and chew gum	Generally safe when prepared traditionally	Verified	Ethiopian WEP reviews	Dryland gum source
7	Balanites aegyptiaca (L.) Delile	Balanitaceae	Beddeena	Fruit, seed oil	Fruit/Oil	W	LC	Eat fruit raw; cold-press oil	Generally safe when prepared traditionally	Verified	Extensively documented; "Desert Date"	High nutritional value; drought-tolerant
8	Brucea antidysenterica J.F. Mill.	Simaroubaceae	Jiloolaafaa	Fruit (medicinal food)	Medicinal food	W	NE	Small quantities; traditional preparation	Use with caution; contains bioactive compounds; avoid during pregnancy/children	Verified with caution	Medicinal use well-documented; edible fruit use limited	Dual-use: food + medicine; traditional famine food
9	Calpurnia aurea (Ait.) Benth.	Fabaceae	Cekaa	Flowers	Vegetable	W	LC	Cook flowers thoroughly	Requires cooking/processing to reduce natural toxins	Verified	Fabaceae toxins require thorough cooking	Traditional; cook well to reduce alkaloids
10	Capparis tomentosa Lam.	Capparaceae	Harangamaa	Fruit, young shoots	Vegetable	W	NE	Cook shoots; eat fruit raw	Requires cooking/processing to reduce natural toxins	Verified	Dual-use documented; shoots contain glucosinolates	Dual use; cook shoots to reduce compounds
11	Carissa edulis (Forssk.) Vahl	Apocynaceae	Agamsa	Fruit	Fruit	W	LC	Eat raw	Generally safe when prepared traditionally	Verified	Documented across Ethiopia/Kenya/Tanzania	Highly preferred wild fruit
12	Carissa spinarum L.	Apocynaceae	Hagamsa	Fruit	Fruit	W	LC	Eat raw	Generally safe when prepared traditionally	Verified	Multiple Ethiopian studies confirm edibility	Common wild snack
13	Clematis hirsuta Perr.	Ranunculaceae	Fiitii	Young shoots	Vegetable	W	NE	Cook shoots thoroughly	Requires cooking/processing to reduce natural toxins	Verified with caution	Ranunculaceae contain protoanemonin toxin	Ranunculaceae; cook to reduce toxins
14	Clutia abyssinica Jaub. & Spach	Euphorbiaceae	Ulee Foni	Young leaves	Vegetable	W	NE	Cook leaves; avoid latex	Requires cooking/processing to reduce natural toxins	Verified with caution	Euphorbiaceae latex is skin/eye irritant	Rare; latex caution; cook thoroughly
15	Combretum molle R.Br. ex G. Don	Combretaceae	Abaluu	Fruits (young)	Fruit	W	LC	Eat young fruits raw	Generally safe when prepared traditionally	Verified	Ethiopian WEP surveys	Seasonal fruit
16	Cordia africana Lam.	Boraginaceae	Wadeesa	Fruit	Fruit	W	LC; locally declining	Eat raw	Generally safe when prepared traditionally	Verified	Among top 3 most cited WEPs in Ethiopia	Monitor local populations
17	Cucumis ficifolius A.Rich.	Cucurbitaceae	Araddoo gurraatti	Fruit	Fruit	W	NE	Eat raw or cooked	Requires cooking/processing to reduce natural toxins	Verified	Wild cucurbit; cook if bitter to reduce cucurbitacins	Wild cucurbit; cook if bitter
18	Dodonaea angustifolia L.f.	Sapindaceae	Iticha	Seeds (roasted)	Snack	W	LC	Roast seeds thoroughly	Requires cooking/processing to reduce natural toxins	Verified	Roasting reduces saponins in Sapindaceae	Traditional snack
19	Dovyalis abyssinica (A. Rich.) Warb.	Salicaceae	Kooshimo	Fruit	Fruit	W	NE	Eat raw	Generally safe when prepared traditionally	Verified	Among top cited species in Ethiopian reviews	Sour edible fruit
20	Ehretia cymosa Thonn.	Boraginaceae	Ulaaga	Fruit	Fruit	W	LC	Eat raw	Generally safe when prepared traditionally	Verified	Ethiopian ethnobotanical literature	Wild edible
21	Embelia schimperi Vatke	Primulaceae	Haanquu	Fruit	Fruit	W	NE	Eat raw	Generally safe when prepared traditionally	Verified	Ethiopian ethnobotany documentation	Wild edible fruit
22	Erythrina brucei Schweinf.	Fabaceae	Walensuu	Flowers	Vegetable	W	LC	Cook flowers thoroughly	Requires cooking/processing to reduce natural toxins	Verified with caution	Fabaceae flowers contain alkaloids	Fabaceae; cook to reduce alkaloids
23	Euclea racemosa Murr.	Ebenaceae	Mi'eessaa	Fruit	Fruit	W	LC	Eat raw	Generally safe when prepared traditionally	Verified	Dryland WEP studies	Drought-tolerant edible
24	Faidherbia albida (Delile) A. Chev.	Fabaceae	Gerbi	Pods, seeds	Famine food	W	LC	Roast seeds; boil pods	Generally safe when prepared traditionally	Verified	Widely documented agroforestry species	Key agroforestry famine food
25	Ficus sur Forssk.	Moraceae	Harbuu	Fruit (figs)	Fruit	W	LC	Eat raw	Generally safe when prepared traditionally	Verified	Ethiopian Ficus checklist confirmed	Fig species
26	Ficus sycomorus L.	Moraceae	Odaa	Fruit (figs)	Fruit	W	LC	Eat raw	Generally safe when prepared traditionally	Verified	Ethiopian Ficus checklist; cultural importance	Cultural importance
27	Ficus thonningii Blume	Moraceae	Odaa Muka	Fruit (figs)	Fruit	W	LC	Eat raw	Generally safe when prepared traditionally	Verified	Ethiopian Ficus checklist confirmed	Widely consumed
28	Ficus vasta Forssk.	Moraceae	Qilxuu Guddicha	Fruit (figs)	Fruit	W	LC	Eat raw	Generally safe when prepared traditionally	Verified	Ethiopian Ficus checklist; dryland importance	Important dryland fig
29	Flacourtia indica (Burm.f.) Merr.	Salicaceae	Hoca	Fruit	Fruit	W	LC	Eat raw	Generally safe when prepared traditionally	Verified	Ethiopian ethnobotanical studies	Wild fruit
30	Gardenia ternifolia Schumach. & Thonn.	Rubiaceae	Danfaa	Fruit	Fruit	W	LC	Eat raw	Generally safe when prepared traditionally	Verified	Rubiaceae well-represented in Ethiopian WEPs	Edible
31	Gardenia volkensii K. Schum.	Rubiaceae	Danfaa Bosonaa	Fruit	Fruit	W	LC	Eat raw	Generally safe when prepared traditionally	Verified	East African ethnobotany documentation	Edible
32	Grewia bicolor Juss.	Malvaceae	Raafuu	Fruit	Fruit	W	NE	Eat raw	Generally safe when prepared traditionally	Verified	Malvaceae is 3rd largest WEP family in Ethiopia	Wild edible
33	Grewia ferruginea Hochst. ex A. Rich.	Malvaceae	Dokonu	Fruit	Fruit	W	NE	Eat raw	Generally safe when prepared traditionally	Verified	Ethiopian surveys documentation	Edible
34	Grewia tembensis Fresen.	Malvaceae	Raafuu Dheeraa	Fruit	Fruit	W	NE	Eat raw	Generally safe when prepared traditionally	Verified	Regional Ethiopian documentation	Edible
35	Grewia villosa Willd.	Malvaceae	Raafuu Gurraacha	Fruit	Fruit	W	NE	Eat raw	Generally safe when prepared traditionally	Verified	Multiple citations in literature	Important wild fruit
36	Juniperus procera Hochst. ex Endl.	Cupressaceae	Hindesa	Berries	Spice	W	NT; over-exploited	Use sparingly as flavoring	Requires cooking/processing to reduce natural toxins	Verified with caution	IUCN NT; potent oils - use in small quantities only	Potent oils; small quantities only
37	Kigelia africana (Lam.) Benth.	Bignoniaceae	Kilimoo	Fruit (processed)	Processed food	W	LC	Ferment/roast/brew; never raw	Use with caution; contains bioactive compounds; avoid during pregnancy/children	Verified with caution	Raw fruit causes irritation; traditional processing essential	Raw fruit causes irritation
38	Lannea fruticosa (Hochst. ex A. Rich.) Engl.	Anacardiaceae	Buqqaatii Bosonaa	Fruit	Fruit	W	LC	Eat raw	Generally safe when prepared traditionally	Verified	Anacardiaceae well-documented in Ethiopia	Traditional edible
39	Lannea schimperi (A. Rich.) Engl.	Anacardiaceae	Buqqaatii	Fruit	Fruit	W	LC	Eat raw	Generally safe when prepared traditionally	Verified	Ethiopian WEP reviews	Edible
40	Lippia adoensis Hochst. ex Walp.	Verbenaceae	Sukaayee	Leaves	Beverage	W	NE	Infuse as tea	Generally safe when prepared traditionally	Verified	Herbal tea use documented	Herbal tea
41	Maesa lanceolata Forssk.	Primulaceae	Abayi	Fruit	Fruit	W	LC	Eat raw	Generally safe when prepared traditionally	Verified	Ethiopian ethnobotany documentation	Edible
42	Ocimum gratissimum L.	Lamiaceae	Daamakasee	Leaves	Spice	W	LC	Use fresh or dried	Generally safe when prepared traditionally	Verified	Lamiaceae well-represented in WEPs	Condiment
43	Olea europaea L. subsp. cuspidata	Oleaceae	Ejersa	Fruit (olive)	Fruit/Oil	W	LC	Cure/brine; extract oil	Requires cooking/processing to reduce natural toxins	Verified	Wild olive; requires curing to remove bitterness	Wild olive; remove bitterness
44	Ormocarpum kirkii S. Moore	Fabaceae	Hiddii Bosonaa	Seeds	Snack	W	NE	Roast seeds	Requires cooking/processing to reduce natural toxins	Verified with caution	Fabaceae seeds require roasting to reduce toxins	Traditional snack
45	Pappea capensis Eckl. & Zeyh.	Sapindaceae	Qilxuu Daalacha	Fruit	Fruit	W	LC	Eat raw	Generally safe when prepared traditionally	Verified	Ethiopian WEP studies	Nutritious
46	Phoenix reclinata Jacq.	Arecaceae	Meexxi	Fruit (dates)	Fruit	W	LC	Eat raw	Generally safe when prepared traditionally	Verified	Widely documented wild date palm	Wild date
47	Podocarpus falcatus (Thunb.) R.Br. ex Mirb.	Podocarpaceae	Birbirsa	Aril only (fleshy seed coat)	Fruit	W	NT; heavy logging	Eat red aril only; discard seed	Contains toxic parts; strictly consume only listed edible portions	Verified with caution	IUCN NT; seed toxic - only red aril edible; conservation priority	Seed toxic; conservation priority
48	Prunus africana (Hook.f.) Kalkman	Rosaceae	Sukkeessaa	Fruit	Fruit	W	VU (Afromontane)	Eat raw; sustainable harvest	Generally safe when prepared traditionally	Verified	IUCN VU; edible fruit but sustainable harvest essential	High-value fruit; conservation priority
49	Rhamnus prinoides L'Her.	Rhamnaceae	Geeshoo	Fruits (beer flavoring)	Beverage	Hg/W	LC; cultivated	Ferment for traditional drinks	Generally safe when prepared traditionally	Verified	Traditional beverage flavoring (tella/tej)	Tella/tej flavoring
50	Rhus natalensis Krauss	Anacardiaceae	Daboobessaa	Fruit	Fruit	W	NE	Eat raw; wash first	Generally safe when prepared traditionally	Verified	Popular seasonal fruit; wash to remove urushiol traces	Popular seasonal wild fruit
51	Searsia vulgaris (Krauss) Moffett	Anacardiaceae	Summaa Diimaa	Fruit	Fruit	W	NE	Eat raw	Generally safe when prepared traditionally	Verified	POWO accepts Searsia vulgaris; Rhus vulgaris is synonym	Similar to R. natalensis
52	Rubus apetalus Poir.	Rosaceae	Goraa Bosonaa	Fruit (berries)	Fruit	W	NE	Eat raw	Generally safe when prepared traditionally	Verified	Ethiopian ethnobotany documentation	Berry
53	Rubus steudneri Schweinf.	Rosaceae	Gora	Fruit (berries)	Fruit	W	NE	Eat raw	Generally safe when prepared traditionally	Verified	Endemic Ethiopian blackberry	Berry
54	Rumex nepalensis Spreng.	Polygonaceae	Shaabbee	Leaves	Vegetable	Hg/W	LC	Cook leaves; discard bitter water	Requires cooking/processing to reduce natural toxins	Verified with caution	Contains oxalates; cook and discard bitter water	Common; contains oxalates
55	Silene macrosolen (A.Rich.) Rohrb.	Caryophyllaceae	Waggarti	Young shoots/leaves	Vegetable	W	NE	Cook young parts thoroughly	Requires cooking/processing to reduce natural toxins	Verified	Traditional green; verify local preparation methods	Traditional green; verify locally
56	Solanum incanum L.	Solanaceae	Hidi orome	Fruit (medicinal food)	Medicinal food	W	LC	Cook thoroughly; ripe fruit only	Use with caution; contains glycoalkaloids; avoid during pregnancy/children	Verified with caution	Contains glycoalkaloids; only ripe fruit thoroughly cooked	Glycoalkaloids present; traditional use only
57	Solanum indicum L.	Solanaceae	Hiddii	Fruit, leaves	Vegetable	W	NE	Cook thoroughly; discard bitter water	Requires cooking/processing to reduce natural toxins	Verified	Cook thoroughly; bitterness indicates higher alkaloids	Cook well; bitterness indicates higher alkaloids
58	Syzygium guineense (Willd.) DC.	Myrtaceae	Baddessa	Fruit	Fruit	W	LC	Eat raw	Generally safe when prepared traditionally	Verified	Among top 3 most cited WEPs in Ethiopia	Key WEP
59	Teclea nobilis Del.	Rutaceae	Hadheesa	Fruit	Fruit	W	NE	Eat raw	Generally safe when prepared traditionally	Verified	Ethiopian ethnobotany documentation	Woody climber fruit
60	Thymus schimperi Ronniger	Lamiaceae	Xooshinee	Leaves	Spice	W	LC	Use in tea/cooking	Generally safe when prepared traditionally	Verified	Lamiaceae well-documented in WEPs	Tea/spice
61	Tragia cinerea Pax	Euphorbiaceae	Laalessaa	Young leaves	Vegetable	W	NE	Cook leaves; avoid latex	Requires cooking/processing to reduce natural toxins	Verified with caution	Euphorbiaceae latex irritates; cook leaves thoroughly	Euphorbiaceae latex irritates
62	Urtica simensis Steud.	Urticaceae	Doobbii	Leaves	Vegetable	Hg/W	LC	Cook to neutralize stinging hairs	Requires cooking/processing to reduce natural toxins	Verified	Stinging hairs neutralized by cooking	Nutritious cooked green
63	Urera hypselodendron (Hochst. ex A. Rich.) Friis	Urticaceae	Haliilaa	Young leaves	Vegetable	W	NE	Cook leaves thoroughly	Requires cooking/processing to reduce natural toxins	Verified with caution	Stinging climber; cook thoroughly to neutralize	Stinging; cook to neutralize
64	Vachellia etbaica (Schweinf.) Kyal. & Boatwr.	Fabaceae	Waaccuu	Pods, gum	Famine food	W	LC	Extract gum; process pods	Generally safe when prepared traditionally	Verified	Acacia relative; famine food documented	Acacia relative; famine food
65	Vachellia nilotica (L.) P.J.H.Hurter & Mabb.	Fabaceae	Burquqqee	Pods, gum	Famine food	W	LC	Extract gum; process pods	Generally safe when prepared traditionally	Verified	Widely used gum source; well-documented	Widely used gum source
66	Verbascum sinaiticum Benth.	Scrophulariaceae	Gurra Harree	Young leaves	Medicinal food	W	NE	Cook young leaves	Use with caution; primarily medicinal; avoid during pregnancy/children	Verified with caution	Primarily medicinal; edible use limited - confirm parts locally	Dual-use; confirm parts locally
67	Vernonia amygdalina Del.	Asteraceae	Ebicha	Young leaves	Vegetable	W	LC; widely used	Cook leaves thoroughly	Requires cooking/processing to reduce natural toxins	Verified	Bitter vegetable; cooking reduces alkaloids; widely used	Bitter vegetable; reduce alkaloids
68	Ximenia americana L.	Olacaceae	Inkoyyee	Fruit, seeds (oil)	Fruit/Oil	W	LC	Eat fruit raw; extract oil	Generally safe when prepared traditionally	Verified	Among top 3 most cited WEPs; nutritional fruit/oil	Nutritional; oil extraction
69	Ziziphus mucronata Willd.	Rhamnaceae	Kurkuraa Bosonaa	Fruit	Fruit	W	LC	Eat raw	Generally safe when prepared traditionally	Verified	Documented across Ethiopia	Common
70	Ziziphus spina-christi (L.) Desf.	Rhamnaceae	Kurkuraa	Fruit	Fruit	W	LC	Eat raw	Generally safe when prepared traditionally	Verified	Nutritional studies confirm edibility	Highly valued
